# Supplementary material for: Prehospital transdermal glyceryl trinitrate for ultra-acute ischaemic stroke: data from the RIGHT-2 randomised sham-controlled ambulance trial
Source: HighWire-hosted journal article supplement (doi:10.1136/svn-2022-001634), 2023-06-08

SUPPLEMENTARY MATERIAL

TABLE OF CONTENTS

|                                          | Page |
|------------------------------------------|------|
| Title                                    | 1    |
| List of supplementary Tables and Figures | 2    |
| Tables (start from)                      | 3    |
| Figures (start from)                     | 7    |

**Title**  
Pre-hospital transdermal glyceryl trinitrate for ultra-acute ischaemic stroke: data from the RIGHT-2 randomised sham-controlled ambulance trial

**LIST OF SUPPLEMENTARY TABLES AND FIGURES**

|                | <b>Title</b>                                                                                         | <b>Page</b> |
|----------------|------------------------------------------------------------------------------------------------------|-------------|
| <b>Tables</b>  |                                                                                                      |             |
| 1              | <i>Adherence and reasons for non-adherence</i>                                                       | 3           |
| 2              | <i>In hospital management and treatment</i>                                                          | 4           |
| 3              | <i>Relationship between imaging characteristics on admission and outcome</i>                         | 5           |
| <b>Figures</b> |                                                                                                      |             |
| 1              | <i>Blood pressure profile by treatment group</i>                                                     | 7           |
| 2              | <i>Changes in A) Glasgow coma scale and B) Face-Arm-Speech test from baseline by treatment group</i> | 8           |
| 3              | <i>Cumulative mortality during the 90 days of follow-up</i>                                          | 9           |
| 4              | <i>Forest plot of outcomes included in the global analysis</i>                                       | 11          |
| 5              | <i>Forest plot of mRS in post hoc subgroups</i>                                                      | 12          |

**Supplementary Table 1.** Adherence and reasons for non-adherence in patients with final diagnosis of ischaemic stroke by treatment group: glyceryl trinitrate (GTN) versus sham. Data are number (%).

|                                                   | All       | GTN       | Sham      |
|---------------------------------------------------|-----------|-----------|-----------|
| Participants with data                            | 597       | 302       | 295       |
| <b>Adherence (%), received</b>                    |           |           |           |
| First treatment                                   | 596 (>99) | 301 (>99) | 295 (100) |
| At least first 2 days of treatment <sup>a</sup>   | 451 (76)  | 227 (75)  | 224 (76)  |
| All 4 days treatment                              | 307 (51)  | 146 (48)  | 161 (55)  |
| <b>Reasons for non-adherence (%) <sup>b</sup></b> |           |           |           |
| Non-stroke diagnosis initially                    | 12 (2)    | 4 (1)     | 8 (3)     |
| Serious adverse event                             | 3 (1)     | 2 (1)     | 1 (<1)    |
| Adverse event (not an SAE)                        | 2 (<1)    | 2 (1)     | 0 (0)     |
| Discharged before day 2                           | 15 (3)    | 11 (4)    | 4 (1)     |
| Participant/proxy refused patch                   | 4 (1)     | 4 (1)     | 0 (0)     |
| Medical decision to stop treatment                | 32 (5)    | 19 (6)    | 13 (4)    |
| Procedural error                                  | 35 (6)    | 14 (5)    | 21 (7)    |
| Trial medication missing/not available            | 13 (2)    | 6 (2)     | 7 (2)     |
| Died                                              | 2 (<1)    | 1 (<1)    | 1 (<1)    |
| Others                                            | 22 (4)    | 10 (3)    | 12 (4)    |

<sup>a</sup> Patients receiving at least the first two days of treatment are considered to have been adherent to treatment

<sup>b</sup> Reasons for non-adherence are not mutually exclusive

**Supplementary Table 2.** In hospital management and treatment for 597 participants with a final diagnosis of ischaemic stroke by treatment group: glyceryl trinitrate (GTN) versus sham. Data are number (%).

| Activity (%)                  | N   | GTN            | Sham           | aOR/DIM<br>(95% CI)    | p-value |
|-------------------------------|-----|----------------|----------------|------------------------|---------|
| Intravenous alteplase         | 597 | 150<br>(49.7)  | 134<br>(45.4)  | 10.91 (0.12,<br>977.7) | 0.30    |
| Door-to-needle time<br>(mins) | 284 | 49 [40,<br>66] | 54 [43,<br>69] | 3.5 (-1, 8)            | 0.15    |
| Thrombectomy                  | 589 | 7 (2.3)        | 17 (5.8)       | 0.35 (0.14,<br>0.87)   | 0.024   |
| Carotid endarterectomy        | 589 | 1 (0.3)        | 2 (0.7)        | 0.11 (0.00,<br>6.48)   | 0.28    |
| Hemicraniectomy               | 588 | 0 (0)          | 1 (0.3)        | -                      | -       |
| Other surgery                 | 588 | 1 (0.3)        | 0 (0)          | -                      | -       |
| Neurosurgical Unit            | 590 | 5 (1.7)        | 8 (2.7)        | 0.80 (0.22,<br>2.97)   | 0.74    |
| Ventilation                   | 589 | 4 (1.3)        | 2 (0.7)        | 1.79 (0.28,<br>11.54)  | 0.54    |
| Acute Stroke Unit             | 592 | 264<br>(88.3)  | 261<br>(89.1)  | 1.03 (0.61,<br>1.76)   | 0.91    |
| Stroke Rehabilitation<br>Unit | 593 | 92 (30.7)      | 113<br>(38.6)  | 0.71 (0.50,<br>1.01)   | 0.055   |
| Physiotherapy                 | 592 | 265<br>(88.6)  | 263<br>(89.8)  | 0.99 (0.58,<br>1.69)   | 0.97    |
| Occupational therapy          | 590 | 254<br>(85.2)  | 249<br>(85.3)  | 1.04 (0.65,<br>1.66)   | 0.87    |
| Speech therapy                | 590 | 212<br>(71.1)  | 217<br>(74.3)  | 0.94 (0.64,<br>1.37)   | 0.73    |

DIM: difference in medians; aOR: adjusted odds ratio.

**Supplementary Table 3.** Relationship between imaging characteristics on admission and death, and modified Rankin Scale score, at day 90 in 597 participants with a final diagnosis of ischaemic stroke. Data are odds ratio (OR) or hazard ratio (HR). Analyses use binary logistic regression, Cox proportional hazards regression or ordinal logistic regression and are unadjusted.

|                                   | Death              |          |      | mRS                |          |      |
|-----------------------------------|--------------------|----------|------|--------------------|----------|------|
|                                   | HR (95% CI)        | p        | p†   | OR (95% CI)        | p        | p†   |
| Patients with data                | 597                |          |      | 597                |          |      |
| Patients with outcome             | 589                |          |      | 580                |          |      |
| <b>Pre-stroke neuroimaging</b>    |                    |          |      |                    |          |      |
| Atrophy                           | 1.28 (0.47, 3.46)  | 0.63     | 0.65 | 1.62 (0.82, 3.20)  | 0.16     | 0.95 |
| PVL                               | 1.37 (0.94, 2.00)  | 0.098    | 0.89 | 2.06 (1.54, 2.77)  | < 0.0001 | 0.83 |
| Old vascular lesion(s)            | 1.37 (0.82, 2.26)  | 0.23     | 0.48 | 2.20 (1.52, 3.18)  | < 0.0001 | 0.17 |
| 'Brain frailty' score             | 1.29 (1.00, 1.67)  | 0.048    | 0.71 | 1.77 (1.46, 2.13)  | < 0.0001 | 0.39 |
| SVD score                         | 1.09 (0.86, 1.40)  | 0.48     | 0.41 | 1.55 (1.28, 1.88)  | < 0.0001 | 0.57 |
| <b>Acute neuroimaging changes</b> |                    |          |      |                    |          |      |
| Infarct size [/5]                 | 1.11 (0.89, 1.39)  | 0.34     | 0.96 | 1.18 (0.99, 1.40)  | 0.066    | 0.42 |
| Degree of ischaemic change [0-2]  | 1.06 (0.84, 1.34)  | 0.62     | 0.71 | 1.10 (0.92, 1.32)  | 0.29     | 0.25 |
| ASPECTS (/12)                     | 0.91 (0.79, 1.05)  | 0.22     | 0.43 | 0.86 (0.76, 0.98)  | 0.022    | 0.62 |
| Infarct swelling (%)              | 1.58 (1.04, 2.39)  | 0.031    | 0.78 | 1.53 (1.07, 2.19)  | 0.019    | 0.12 |
| Mass effect [/6]                  | 1.45 (1.12, 1.88)  | 0.0049   | 0.34 | 1.42 (1.12, 1.82)  | 0.0046   | 0.56 |
| Hyperdense artery (%)             | 1.59 (1.01, 2.51)  | 0.046    | 0.37 | 1.55 (1.08, 2.22)  | 0.017    | 0.15 |
| Arteries sum [0-7]                | 0.85 (0.62, 1.18)  | 0.34     | 0.72 | 0.89 (0.73, 1.09)  | 0.25     | 0.31 |
| Q165                              |                    |          |      |                    |          |      |
| Post-alteplase HTI (%)            | 6.36 (3.19, 12.69) | < 0.0001 | 0.59 | 8.63 (3.13, 23.75) | < 0.0001 | 0.63 |
| Post-thrombectomy HTI (%)         | -                  | -        | -    | -                  | -        | -    |

|                         |                   |      |      |                   |       |       |
|-------------------------|-------------------|------|------|-------------------|-------|-------|
| <b>CTA</b>              |                   |      |      |                   |       |       |
| Hyperdense artery (%)   | 1.07 (0.31, 3.64) | 0.92 | 0.64 | 2.29 (0.96, 5.44) | 0.060 | 0.043 |
| mTICI [0-5]             | 0.96 (0.68, 1.34) | 0.79 | 0.84 | 1.02 (0.81, 1.28) | 0.86  | 0.12  |
| Mori [0-6]              | 0.92 (0.68, 1.25) | 0.59 | 0.65 | 1.00 (0.82, 1.22) | 1.00  | 0.22  |
| Clot burden [0-10]      | 0.94 (0.81, 1.10) | 0.44 | 0.89 | 1.03 (0.93, 1.13) | 0.57  | 0.11  |
| Arteries sum [0-7]      | 0.94 (0.63, 1.43) | 0.78 | 0.90 | 1.04 (0.79, 1.37) | 0.78  | 0.052 |
| Collateral status [0-3] | 0.86 (0.51, 1.45) | 0.58 | 0.85 | 1.09 (0.79, 1.51) | 0.59  | 0.14  |
| <b>Carotid imaging</b>  |                   |      |      |                   |       |       |
| Stenosis >70% vs <30%   | 0.91 (0.12, 6.96) | 0.93 | 0.99 | 1.33 (0.55, 3.22) | 0.53  | 0.86  |

ASPECTS: Alberta Stroke Program Early CT Score; CTA: CT angiography; HTI: haemorrhagic transformation of infarct; mTICI: modified thrombolysis in cerebral infarction; PVL: periventricular lucencies; SVD: small vessel disease.

p†: p for interaction with GTN vs sham

**Supplementary Figure 1.** Blood pressure profile in 597 participants with a final diagnosis of ischaemic stroke by treatment group: glyceryl trinitrate (GTN) versus sham.

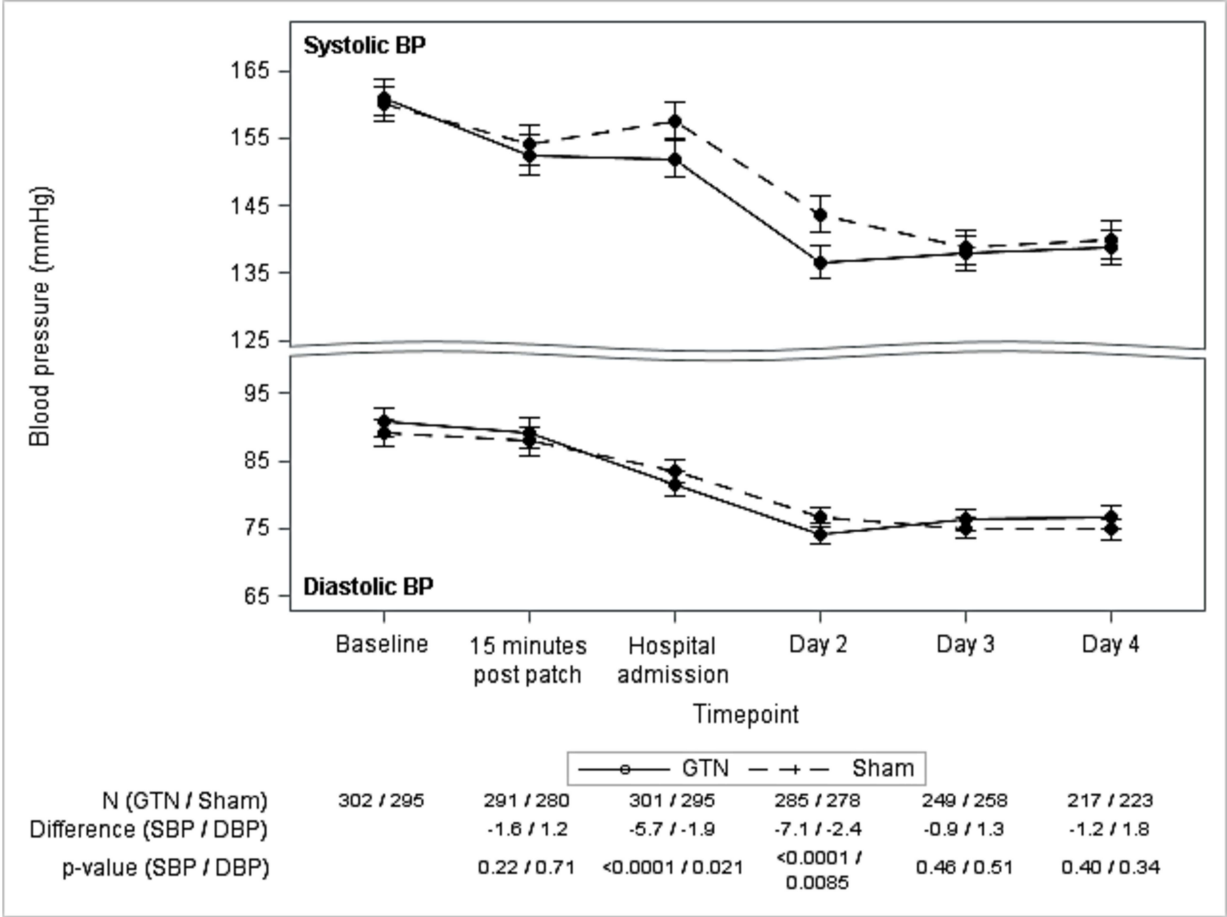

**Supplementary Figure 2.** Forest plot showing modified Rankin scale in *post hoc* subgroups of participants with ischaemic stroke, with p-value for interaction.

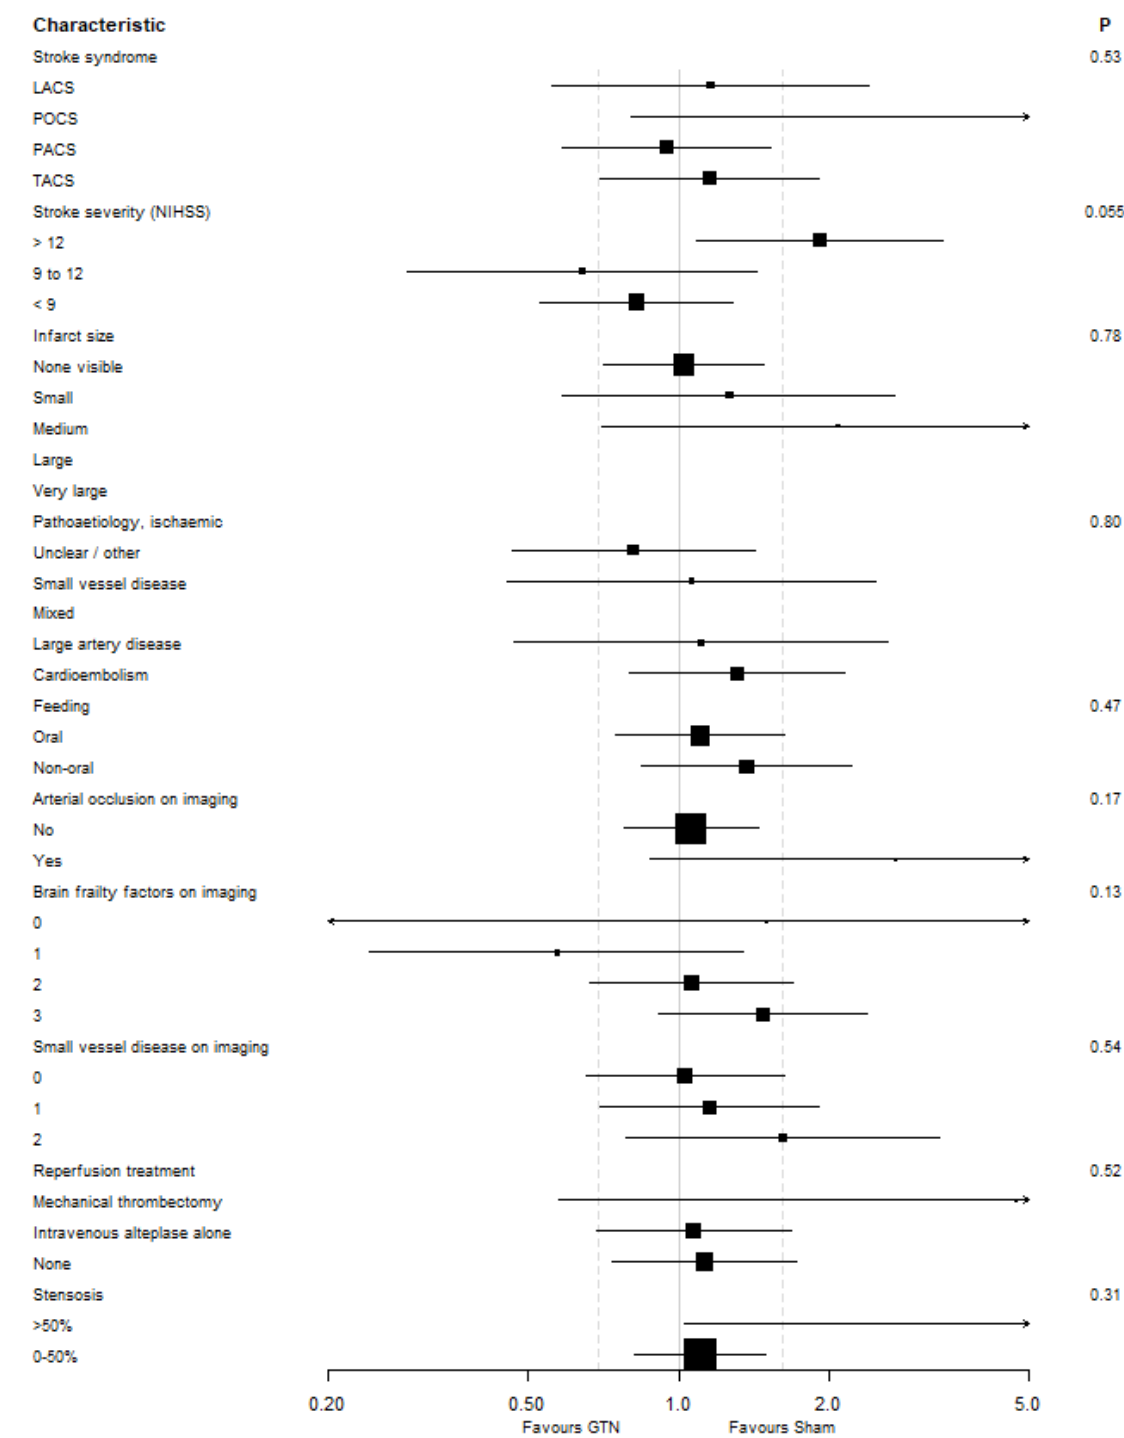



**Supplementary Figure 3.** Changes in Glasgow coma scale and Face-Arm-Speech test from baseline in ambulance 597 participants with a final diagnosis of ischaemic stroke by treatment group: glyceryl trinitrate (GTN) versus sham.

A) Glasgow coma scale (GCS) with Bonferroni corrected ANCOVA

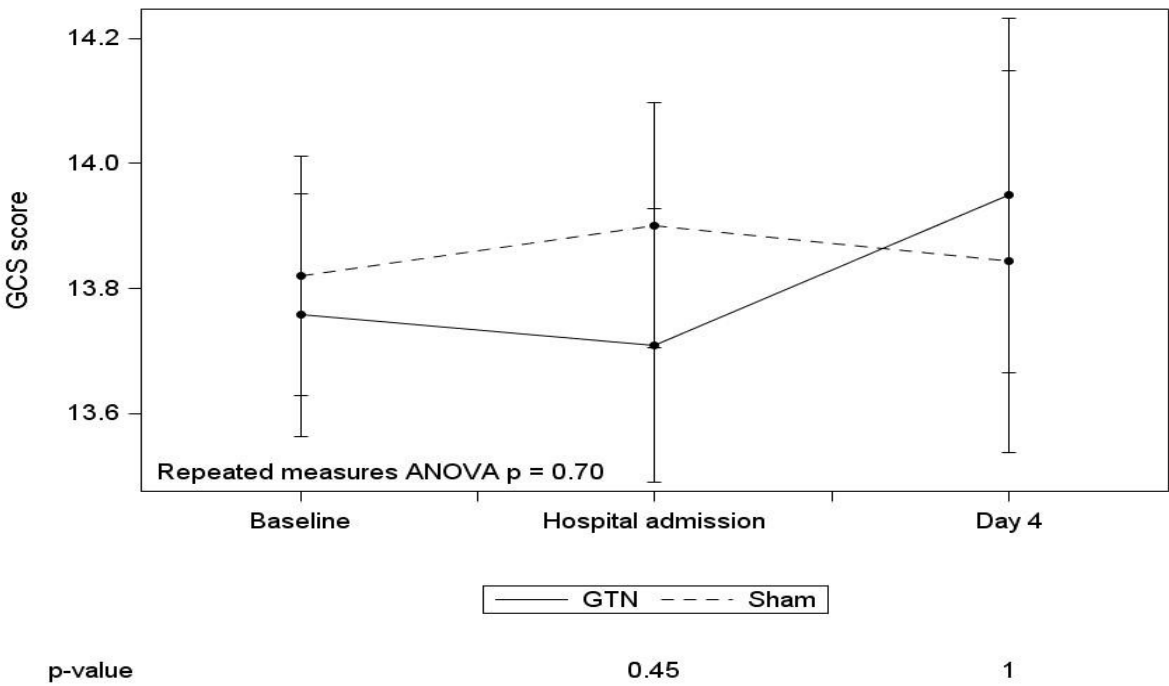

B) Face-Arm-Speech test with Bonferroni corrected ANCOVA

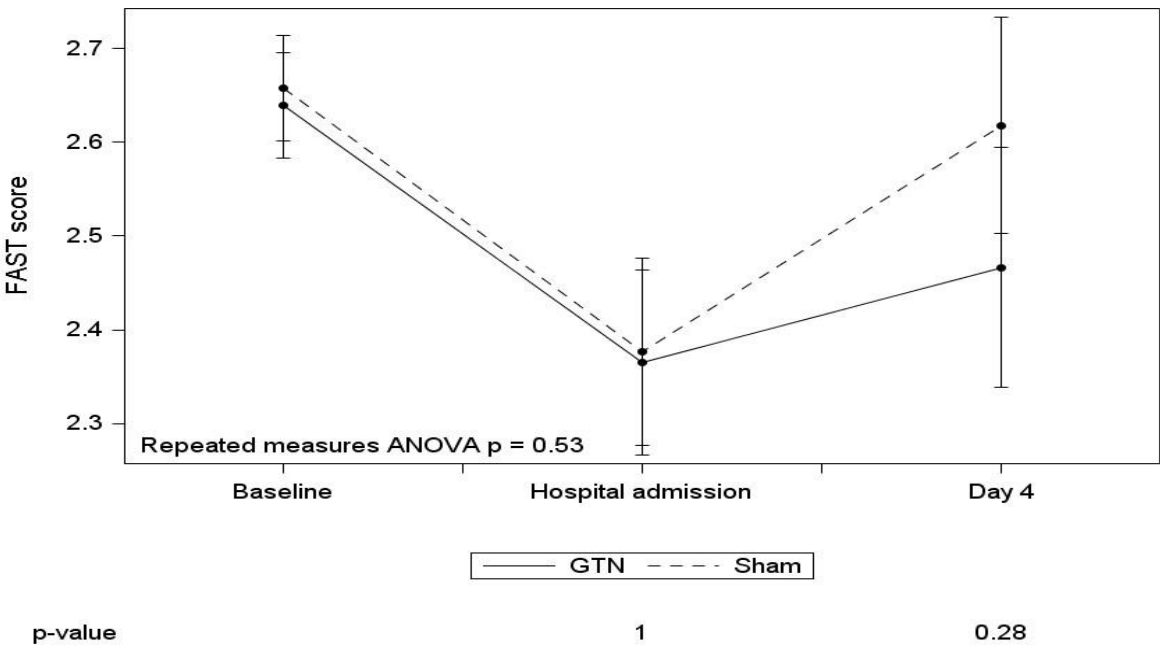

**Supplementary Figure 4.** Cumulative case fatality during the 90 days of follow-up after randomisation in 597 participants with a final diagnosis of ischaemic stroke by treatment group – glyceryl trinitrate (GTN) versus sham. Comparison of GTN versus sham by Cox regression with adjustment for age, sex, pre-morbid modified Rankin Scale, face-arm-speech time test, pre-treatment systolic BP, and time to randomisation.

Adjusted hazard ratio 1.24, 95% CI (0.85, 1.81), p=0.27

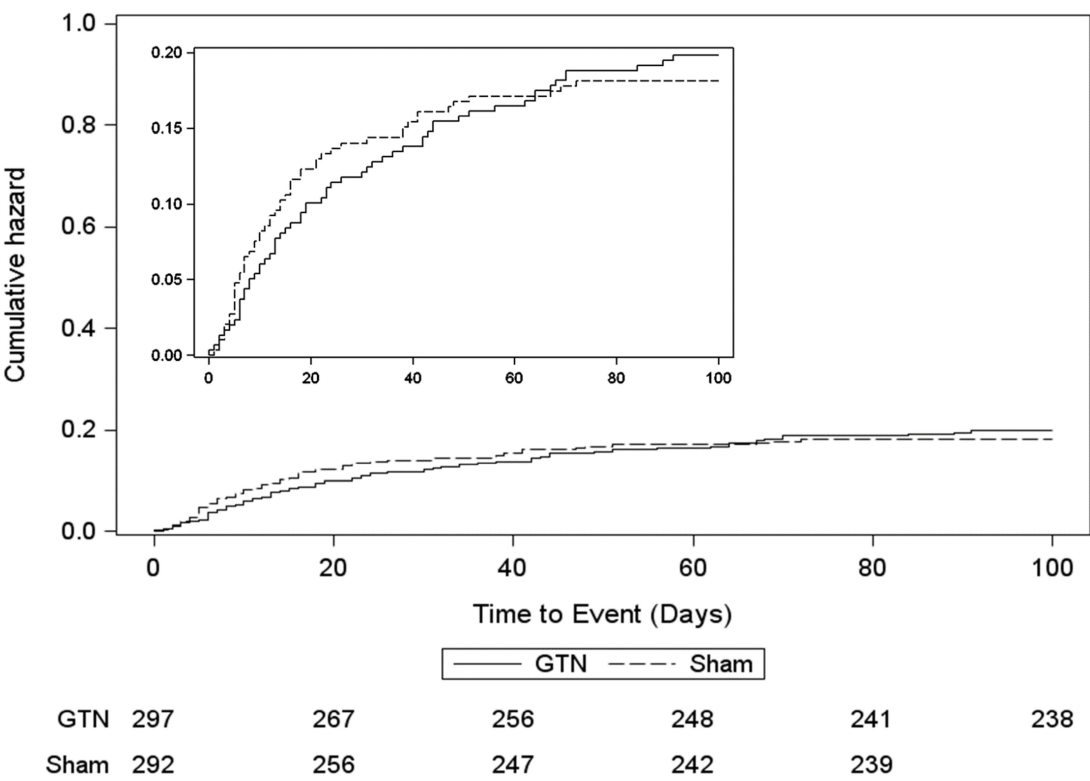

**Supplementary Figure 5.** Forest plot of outcomes included in the global analysis (modified Rankin scale, Barthel index, Euro-Qol-5D, Zung depression scale, telephone interview cognition scale-modified – Wei-Lachin test) in 300 participants with a final diagnosis of ischaemic stroke by treatment group – glyceryl trinitrate (GTN) versus sham.

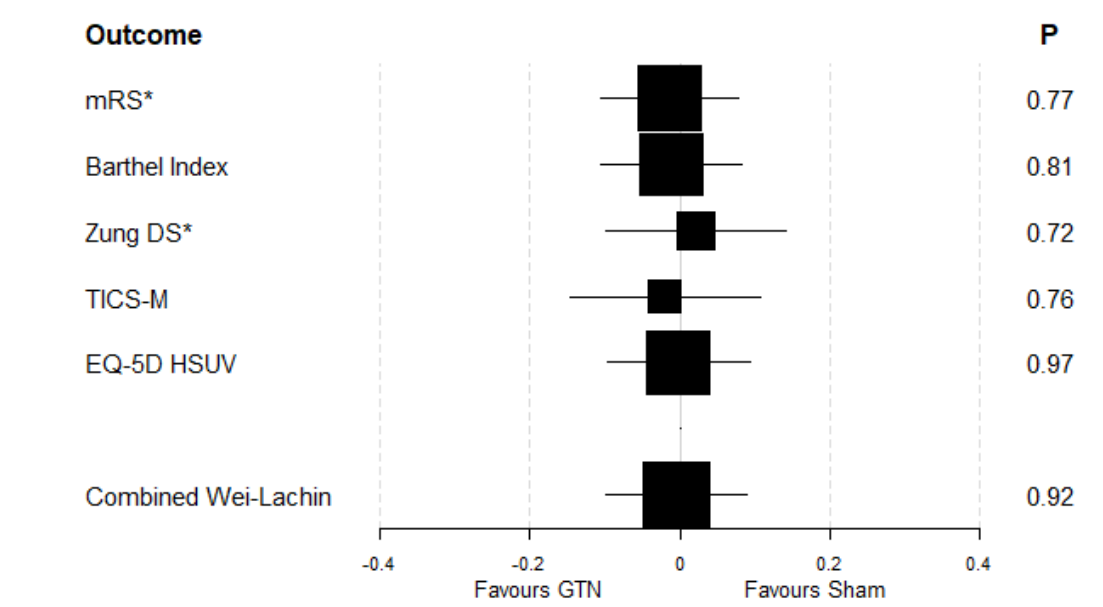

Supplement: svn-2022-001634supp001_data_supplement.pdf [file svn-2022-001634supp001_data_supplement.pdf]
